# Supplementary material for: Transformation of a copper-based metal–organic polyhedron into a mixed linker MOF for CO2 capture
Source: Royal Society of Chemistry journal article supplement (doi:10.1039/d2dt04162f), 2023-01-01
Supplement: d2dt04162f1.pdf [file d2dt04162f1.pdf]

## Supporting file

### Transformation of a Copper-based Metal-Organic Polyhedra into a Mixed Linker MOF for CO<sub>2</sub> Capture

Muhammad Abbas,<sup>1</sup> Amanda M. Maceda,<sup>1</sup> Zhifeng Xiao,<sup>2</sup> Hong-Cai Zhou,<sup>2</sup> Kenneth J. Balkus Jr.<sup>1\*</sup>

<sup>1</sup>Department of Chemistry and Biochemistry, The University of Texas at Dallas, 800 West Campbell Rd, Richardson, TX 75080, United States

<sup>2</sup>Department of Chemistry, Texas A&M University, College Station, TX 77843, United States

\*Corresponding author: [balkus@utdallas.edu](mailto:balkus@utdallas.edu)

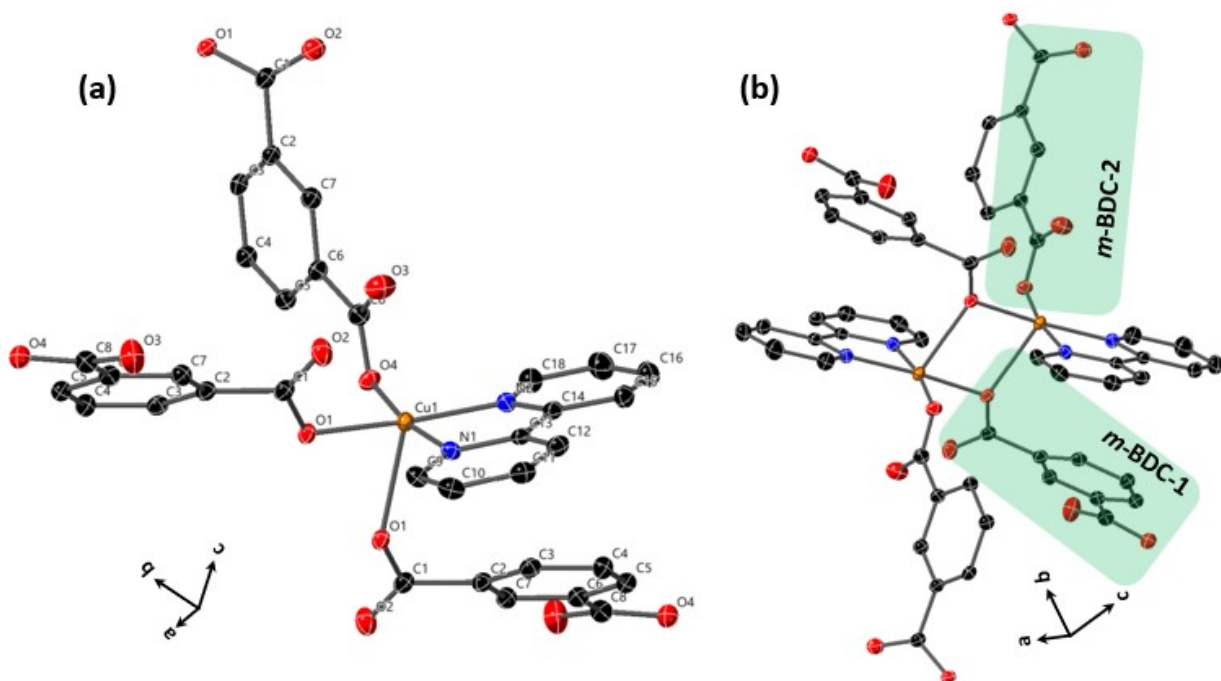

**Figure S1.** CuMOF-Bipy crystal structure displaying the (a) asymmetric unit with atom numbering and (b) the binuclear copper node and isophthalic acid linkers, highlighted to show their structural differences.

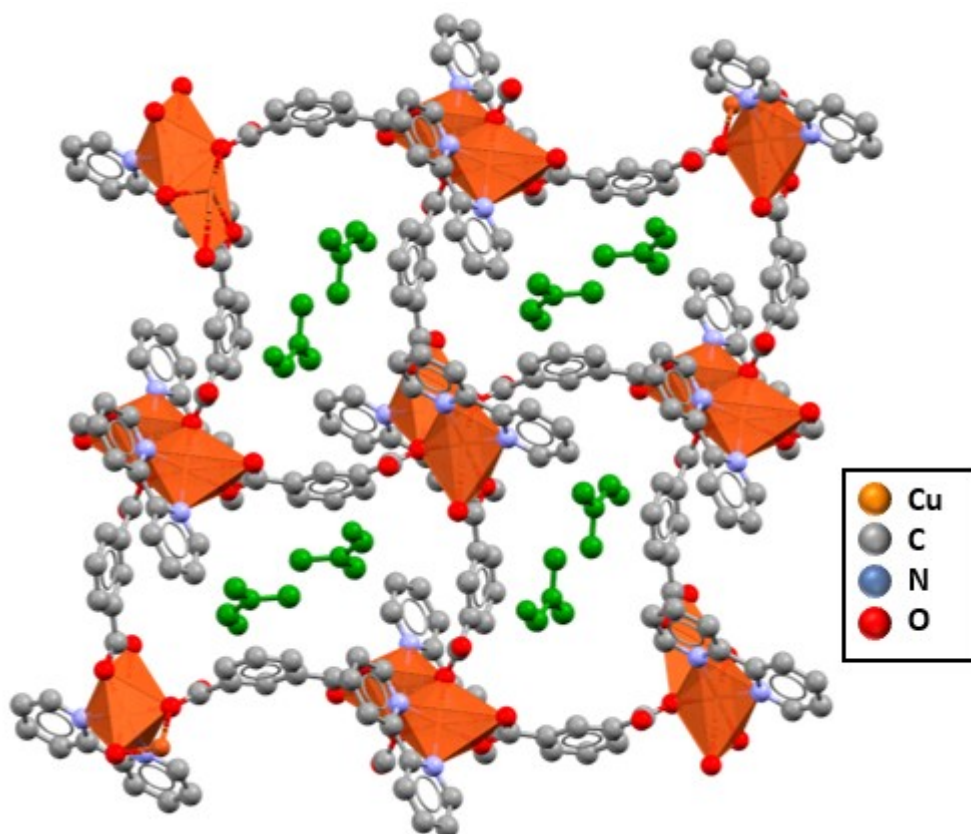

**Figure S2.** The extended structure of **CuMOF-Bipy** along *a*-axis showing uncoordinated DMF molecules (highlighted green) in the pores.

**Table S1.** Crystallographic data and structure refinement results for **CuMOF-Bipy**

| Compound          | CuMOF-Bipy                                                                     |
|-------------------|--------------------------------------------------------------------------------|
| CCDC number       | 2212850                                                                        |
| Empirical formula | C <sub>42</sub> H <sub>38</sub> Cu <sub>2</sub> N <sub>6</sub> O <sub>10</sub> |
| Formula weight    | 913.86                                                                         |
| Crystal system    | Monoclinic                                                                     |
| Space group       | <i>P2</i> <sub>1</sub> / <i>c</i>                                              |
| <i>a</i> (Å)      | 9.8053(2)                                                                      |
| <i>b</i> (Å)      | 15.5940(3)                                                                     |

|                                                       |                                                                         |
|-------------------------------------------------------|-------------------------------------------------------------------------|
| <b><i>c</i></b> (Å)                                   | 13.0691(3)                                                              |
| <b><i>β</i></b> (°)                                   | 95.514(1)                                                               |
| <b>Volume</b> (Å <sup>3</sup> )                       | 1989.1(7)                                                               |
| <b>Z</b>                                              | 2                                                                       |
| <b>ρ</b> (calc.)(g/cm <sup>3</sup> )                  | 1.526                                                                   |
| <b>λ</b>                                              | 0.71073 Å                                                               |
| <b>Temp.</b> (K)                                      | 110                                                                     |
| <b>F(000)</b>                                         | 1632.0                                                                  |
| <b>μ</b> (mm <sup>-1</sup> )                          | 1.137                                                                   |
| <b>T<sub>min</sub>, T<sub>max</sub></b>               | 0.7489, 0.6907                                                          |
| <b>2θ<sub>range</sub></b> (°)                         | 4.924 to 90.99                                                          |
| <b>Reflections collected</b>                          | 441443                                                                  |
| <b>Independent reflections</b>                        | 16776                                                                   |
|                                                       | [ <i>R</i> <sub>int</sub> = 0.0590, <i>R</i> <sub>sigma</sub> = 0.0175] |
| <b>Completeness</b>                                   | 99.7%                                                                   |
| <b>Data/restraints/ parameters</b>                    | 16776/18/321                                                            |
| <b>Final R indexes [<i>I</i> ≥ 2σ (<i>I</i>)]</b>     | <i>R</i> <sub>1</sub> = 0.0288, w <i>R</i> <sub>2</sub> = 0.0722        |
| <b>Final R indexes [all data]</b>                     | <i>R</i> <sub>1</sub> = 0.0412, w <i>R</i> <sub>2</sub> = 0.0781        |
| <b>Goodness-of-fit on <i>F</i><sup>2</sup></b>        | 1.027                                                                   |
| <b>Largest diff. peak and hole (e Å<sup>-3</sup>)</b> | 0.69/-0.86                                                              |

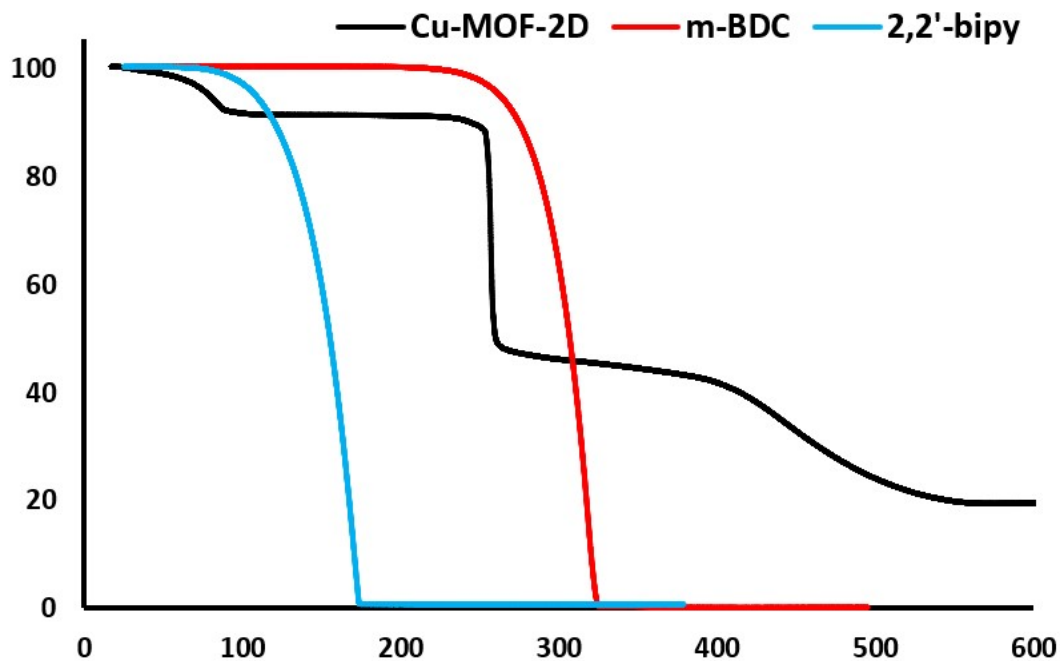

Figure S3 TGA curves for CuMOF-Bipy in comparison to organic linkers used in synthesis

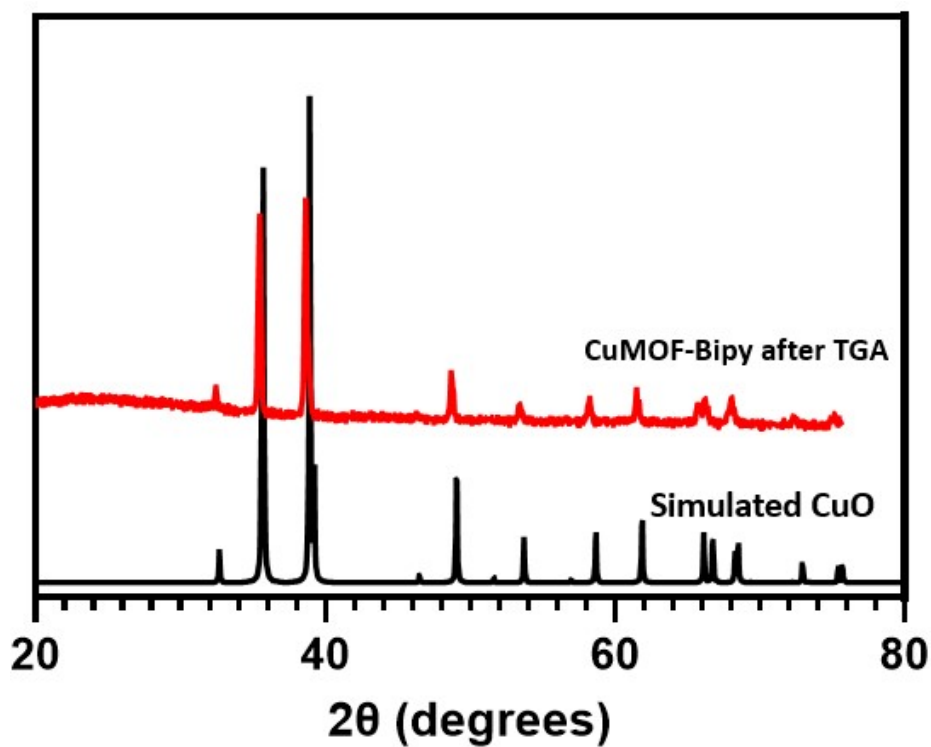

Figure S4. PXRD pattern of remaining CuMOF-Bipy after TGA under air at 600°C compared to CuO (simulated from ICSD 26715).<sup>1</sup>

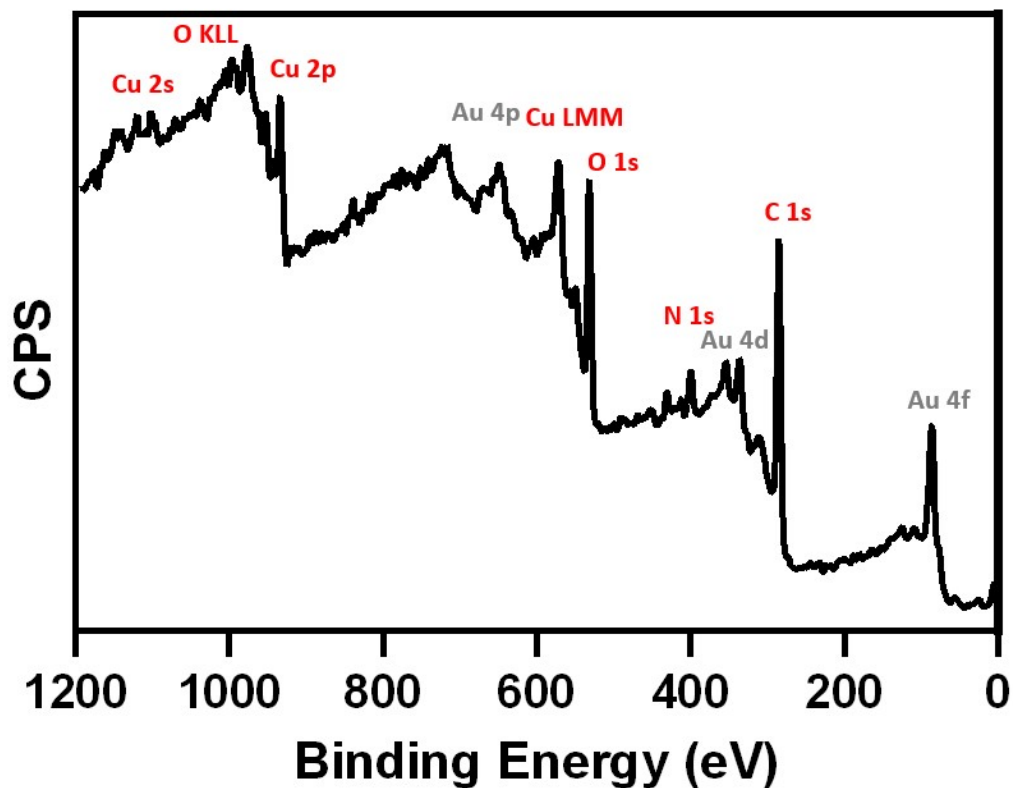

**Figure S5.** The survey XPS spectrum of CuMOF-Bipy, Au (4f, 4d, 4p, and 4s) peaks come from the reference used for charge correction

**Table S2.** Atomic concentrations calculated from XPS spectra

| CuMOF-Bipy             | C (%) | N (%) | O (%) | Cu (%) |
|------------------------|-------|-------|-------|--------|
| Theoretical calculated | 70    | 10    | 16.6  | 3.33   |
| Actual                 | 71.21 | 8.10  | 17.33 | 3.37   |

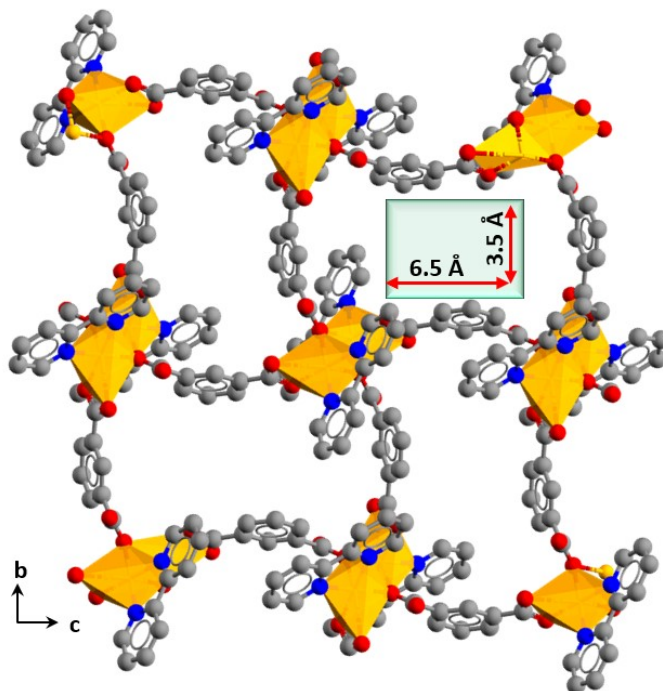

**Figure S6.** Calculated pore-openings in **CuMOF-Bipy** crystal structure viewed along *a*-axis

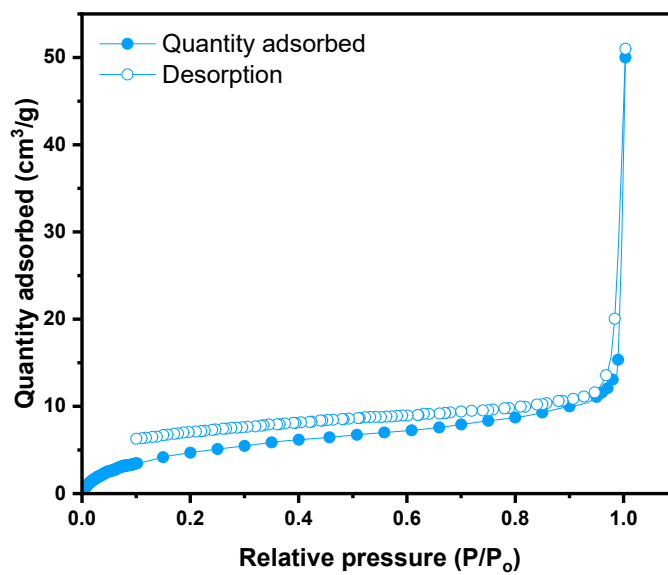

**Figure S7.** Nitrogen adsorption isotherm for **CuMOF-Bipy** at 77 K

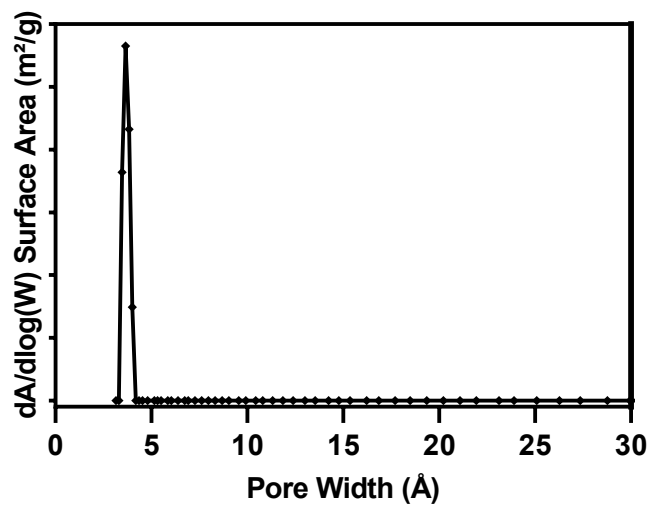

Figure S8. Pore size distribution in CuMOF-Bipy

#### References

1. Tunell, G, Posnjak, E, Ksanda, C J, *Z.Kristallogr.Mineral.Petrogr.Abt .A* (1935), **90**, 120
